# Supplementary material for: Self-Powered Well-Aligned P(VDF-TrFE) Piezoelectric Nanofiber Nanogenerator for Modulating an Exact Electrical Stimulation and Enhancing the Proliferation of Preosteoblasts
Source: MDPI journal article supplement (doi:10.3390/nano9030349), 2019-03-03
Supplement: s1 [file s1]

## Supporting Information

### Self-powered Well-aligned P(VDF-TrFE) Piezoelectric Nanofiber Nanogenerator for Modulating an Exact Electrical Stimulation and Enhancing the Proliferation of Pre-osteoblasts

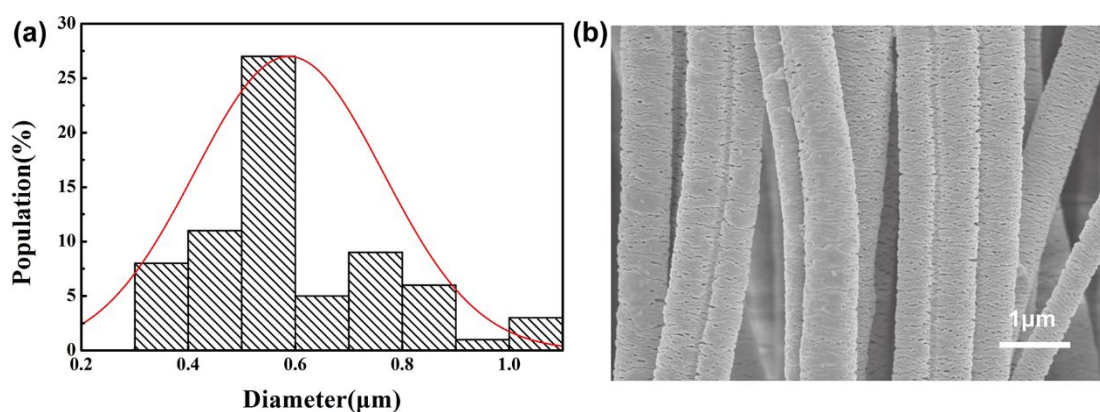

**Figure S1.** The diameter distribution and morphology. (a) The diameter distribution of electrospun nanofibers; (b) The SEM magnification of A-NFM.

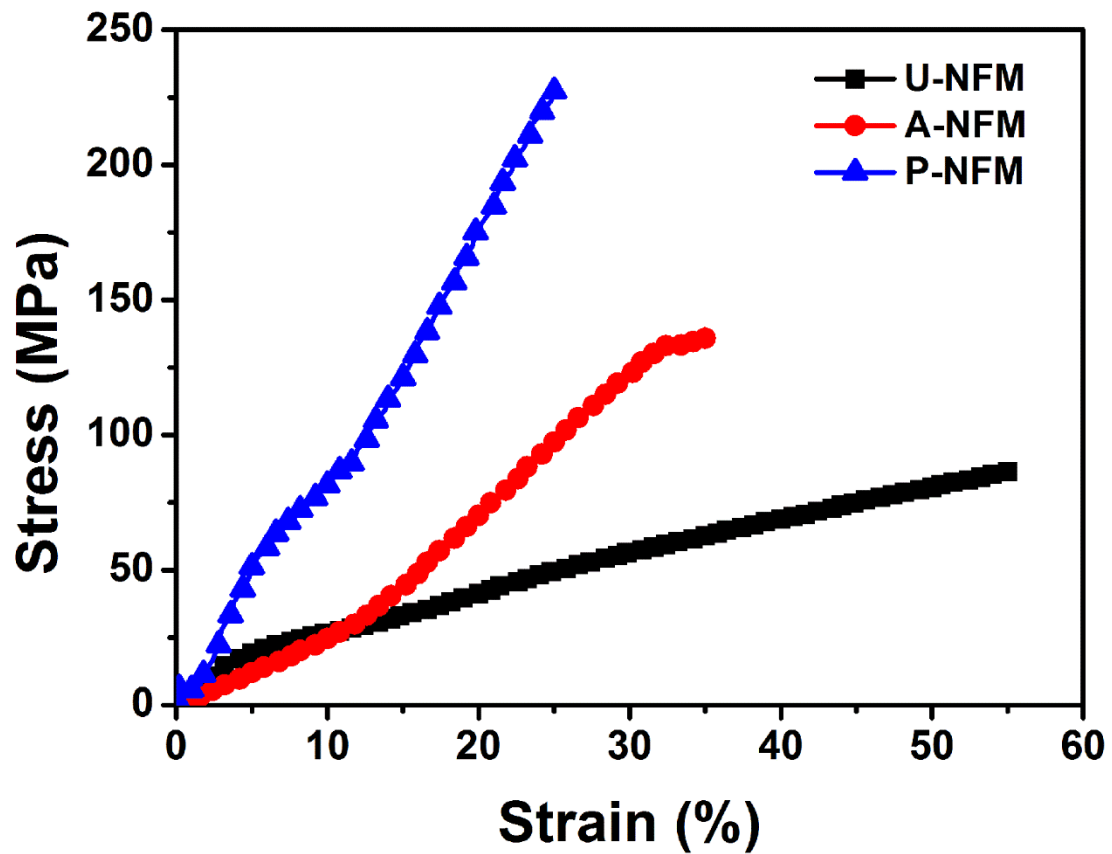

Figure S2. The strain-stress plots of the different NFMs.

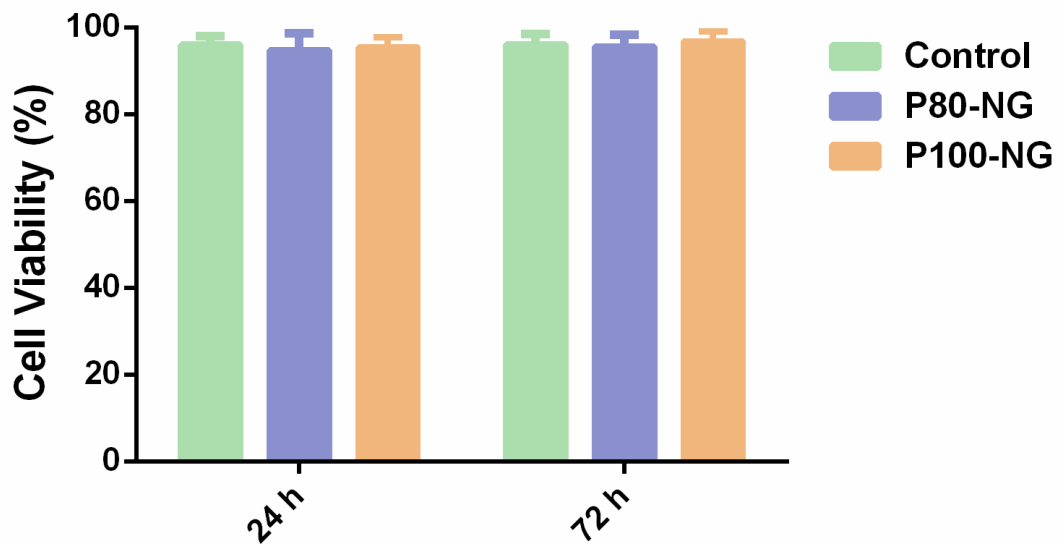

Figure S3. The cell viability of MC3T3-E1 on P80-NG, P100-NG and control (the tissue culture polystyrenes, TCPS).
